# Supplementary material for: BAP1 promotes osteoclast function by metabolic reprogramming
Source: Springer Nature journal article supplement (doi:10.1038/s41467-023-41629-4), 2023-09-22

1 **SUPPLEMENTARY INFORMATION**

2  
3  
4  
5 **BAP1 promotes osteoclast function by metabolic reprogramming.**

6 Nidhi Rohatgi, Wei Zou, Yongjia Li, Kevin Cho, Patrick L. Collins, Eric Tycksen,  
7 Gaurav Pandey, Carl J. DeSelm, Gary J. Patti, Anwesha Dey and Steven L. Teitelbaum  
8

## 9 Supplementary Figures

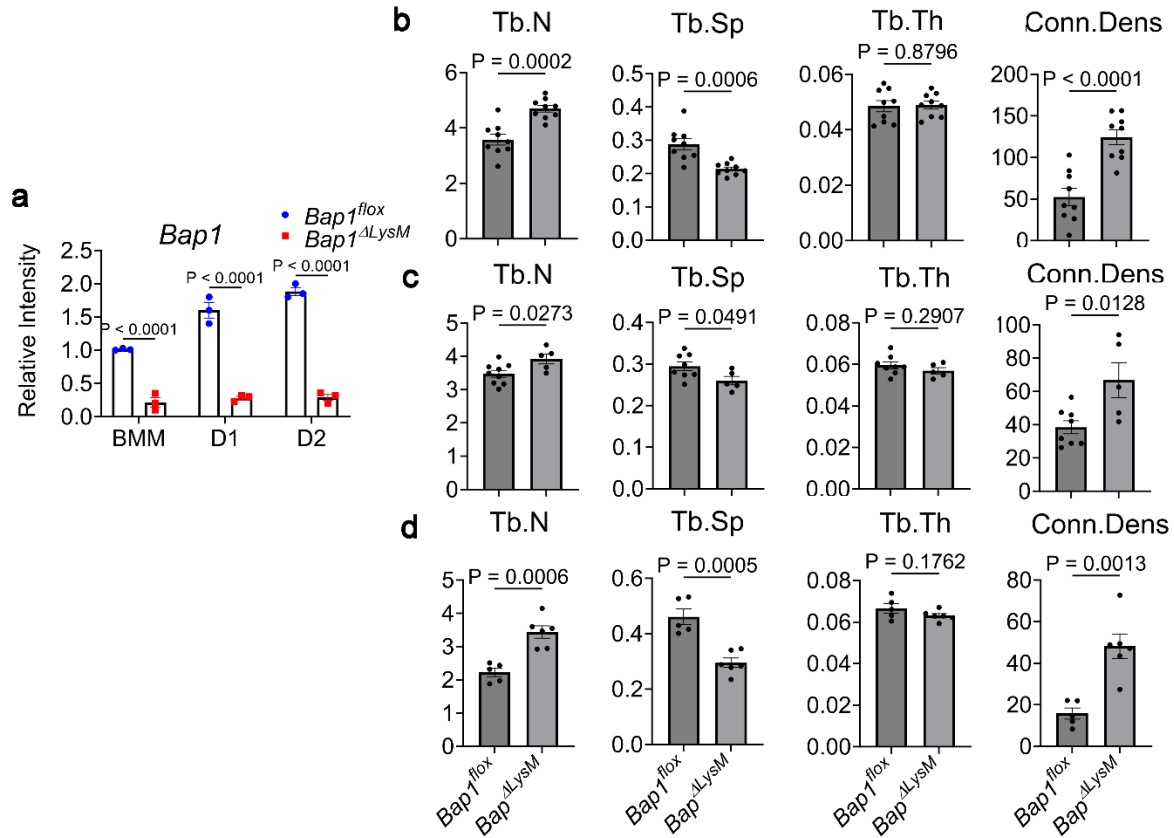

### Supplementary Fig. 1: *Bap1*<sup>ΔLysM</sup> Mice Are Osteopetrotic. a) *Bap1*<sup>flox</sup> and *Bap1*<sup>ΔLysM</sup> BMMs

derived from 8-week old mice were exposed to MCSF ± RANKL (100 ng/ml) for indicated time.

*Bap1* mRNA expression was determined by qPCR analysis. Day 2 untreated BMMs serve as

control. **b-d**  $\mu$ CT analysis of femurs of (b) 20 week old males (n=9 biological samples); (c) 20

week old females (*Bap1*<sup>flox</sup> n=6 and *Bap1*<sup>ΔLysM</sup> n=5) (d) 1 year old male mice (*Bap1*<sup>flox</sup> n = 5 and

*Bap1*<sup>ΔLysM</sup> n=6 mice). Conn-Dens, connectivity density, normed by TV; TbN, trabecular number;

TbSp, trabecular separation; TbTh, trabecular thickness. Data represent mean  $\pm$  SEM. *P* values

shown are determined by two-way ANOVA with Sidak multiple comparison testing (a) or two-

sided Student's *t*-test (b-d). Source data are provided as Source Data file.

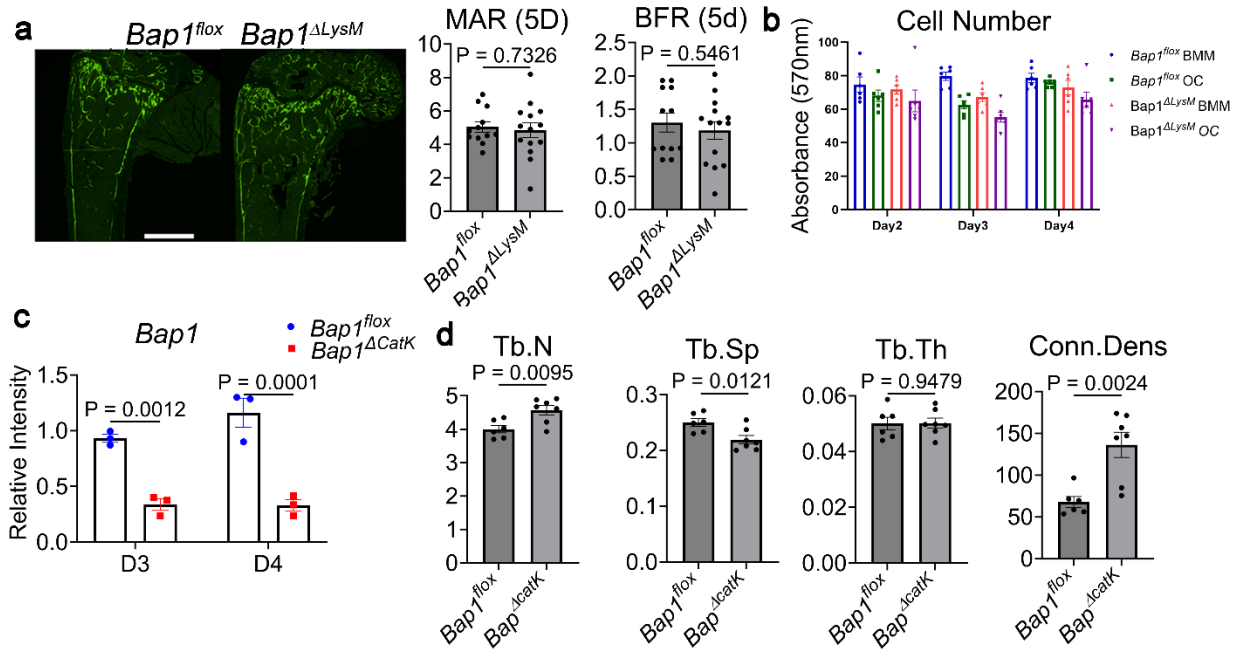

**Supplementary Fig. 2: Bap1 Regulates Osteoclast Function.** **a** Double labelling in 8 week old *Bap1<sup>flox</sup>* and *Bap1<sup>ΔLysM</sup>* male mice (*Bap1<sup>flox</sup>* n=12 and *Bap1<sup>ΔLysM</sup>* n=14 biologically independent samples). Scale Bar represents 1mm. **b** *Bap1<sup>flox</sup>* and *Bap1<sup>ΔLysM</sup>* BMMs cultured with M-CSF and RANKL (100 ng/mL) for days as indicated. Alamar Blue assay was done to measure cell numbers (n=5-6 biologically independent samples). **c** Gene expression analysis of *Bap1* deletion in 20-week old *Bap1<sup>ΔcatK</sup>* mice (n=3 independent experiments). **d**  $\mu$ CT analysis of femurs of 20-week old *Bap1<sup>flox</sup>* and *Bap1<sup>ΔcatK</sup>* males (*Bap1<sup>flox</sup>* n = 6 and *Bap1<sup>ΔLysM</sup>* n=7 biologically independent samples). Data represents mean  $\pm$  SEM. *P* values shown are determined by two-sided Student's *t* test (**a**, **d**) or two-way ANOVA with Sidak's multiple comparison testing (**b**, **c**). Source data are provided as a Source Data file.

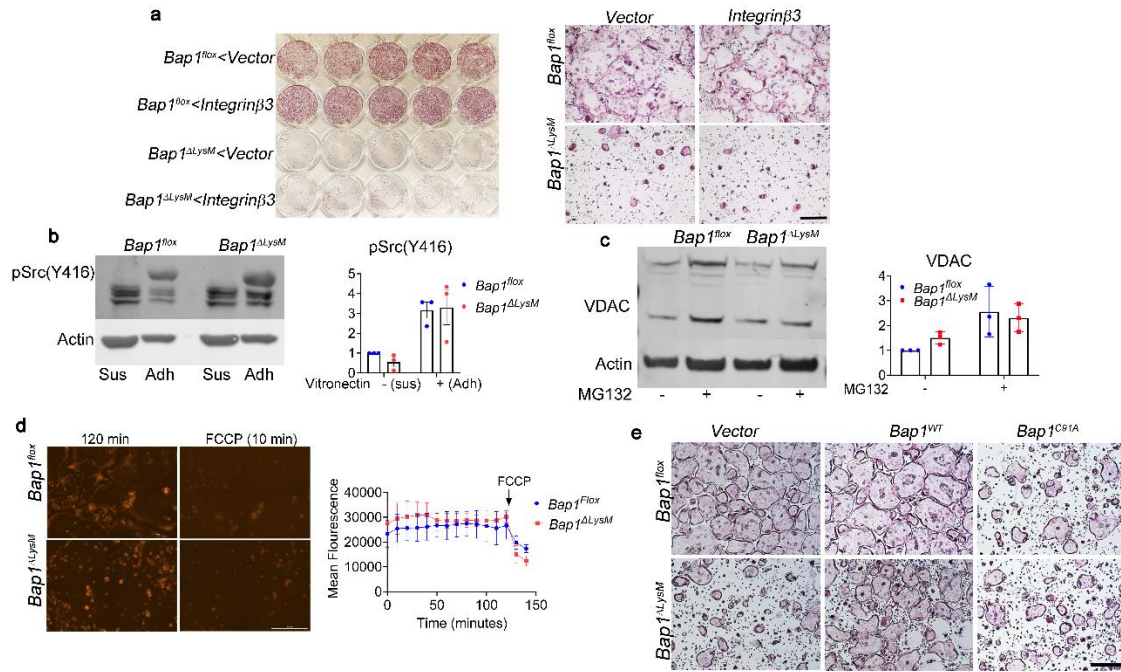

### Supplementary Fig. 3: Bap1 epigenetic activity modulates osteoclast function. a

Representative image of whole plate (left) and TRAP stained microscopic image (right) of

*Bap1<sup>flox</sup>* and *Bap1<sup>ΔLysM</sup>* osteoclast derived from 8-12 week old male mice transduced with

*integrin β3* or *vector* (n=2 independent experiments). Scale bar represents 500μm. **b** Day 3

*Bap1<sup>flox</sup>* and *Bap1<sup>ΔLysM</sup>* preOCs derived from 8-12 week old male mice were cultured for 3h in

serum-free medium. The cells were plated on vitronectin-coated petri-dishes or maintained in

suspension for 30 min. Total cell lysate was collected and pSrc(Y416) and Actin were

determined by immunoblot; n=3 independent experiments. **c** *Bap1<sup>flox</sup>* and *Bap1<sup>ΔLysM</sup>* preOCs were

cultured for 30 min with proteasome inhibitor, 5 μM MG132 or DMSO as control. Cell lysates

were immunoprecipitated (IP) with ubiquitin antibody and analyzed by Western blotting (WB)

with VDAC antibody; n=3 independent experiments. **d** Mitochondrial membrane potential

(MMP) was measured in live cells for 2h followed by FCCP treatment. Representative image of

TMRM staining in osteoclast (left) scale bar represents 200μm; quantification of MMP over 2h

45 (right) (n=2). **e** Representative image of *Bap1<sup>flox</sup>* and *Bap1<sup>ΔLysM</sup>* osteoclast transduced with  
46 *vector*, *Bap1<sup>WT</sup>* or *Bap1<sup>C91A</sup>* constructs after which cells were stained for TRAP activity (n=3  
47 independent experiments). Scale bar represents 500μm. Data represents mean ± SEM. Statistics  
48 conducted by two-way ANOVA with Sidak's multiple comparison testing (**c,d,e**). No  
49 significance was noted in comparison to their respective controls. Source data are provided as  
50 Source Data file.

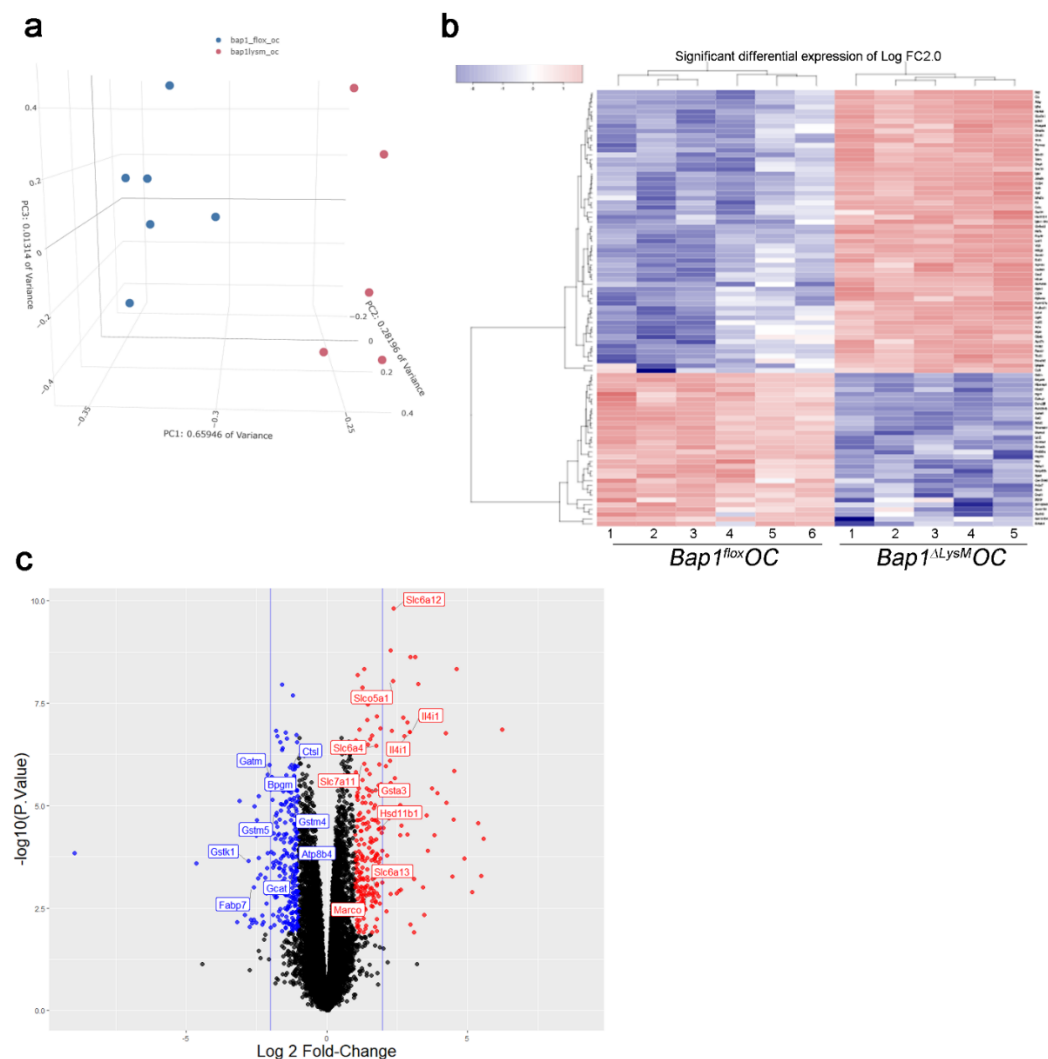

**Supplementary Fig. 4: Bap1 regulates osteoclast transcriptional program.** **a** PCA plot demonstrating separation by genotype. **b** Heatmap of 50 most upregulated (red) or downregulated (blue) genes during RNA-seq of mRNAs of *Bap1<sup>fllox</sup>* and *Bap1<sup>ΔLysM</sup>* preOCs based on the Log FC value. **c** Volcano plots of RNAseq data to visualize genes (data points) that are being identified as differentially expressed in *Bap1<sup>ΔLysM</sup>* osteoclast compared with *Bap1<sup>fllox</sup>*. The red and blue dots represent genes with at least 1.5-fold increase or decrease in *Bap1<sup>ΔLysM</sup>* respectively. Candidate genes involved in metabolism are identified in blue and solute carriers identified in red.

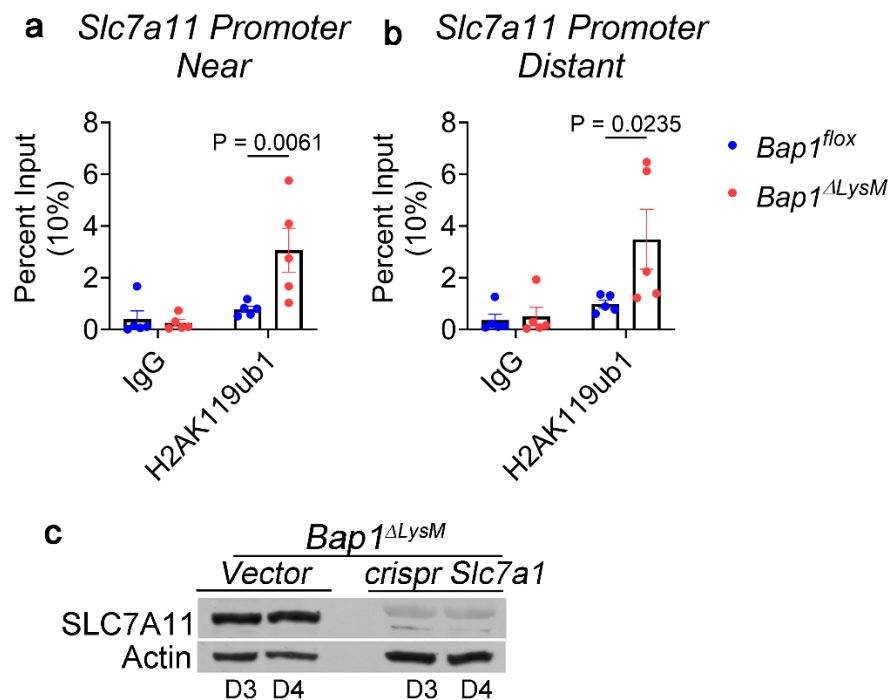

**Supplementary Fig. 5: Bap1 regulates *Slc7a11* expression.** **a-b** ChIP-qPCR showing H2Aub binding on different *Slc7a11* promoter regions (near and distant) in 16-20 week old *Bap1<sup>ΔLysM</sup>* and *Bap1<sup>fllox</sup>* preOCs (n = 3 biologically independent samples). **c** Representative blot for SLC7A11 protein expression in *Bap1<sup>ΔLysM</sup>* BMMs knockdown with *Slc7a11* and exposed to M-CSF and RANKL (100 ng/ml) for 3 and 4 days (n=2 biologically independent samples). Data represents mean  $\pm$  SEM. *P* values shown are determined by two-way ANOVA with Sidak's multiple comparison test used for statistical analysis (**a,b**). Source data are provided as a Source Data file.

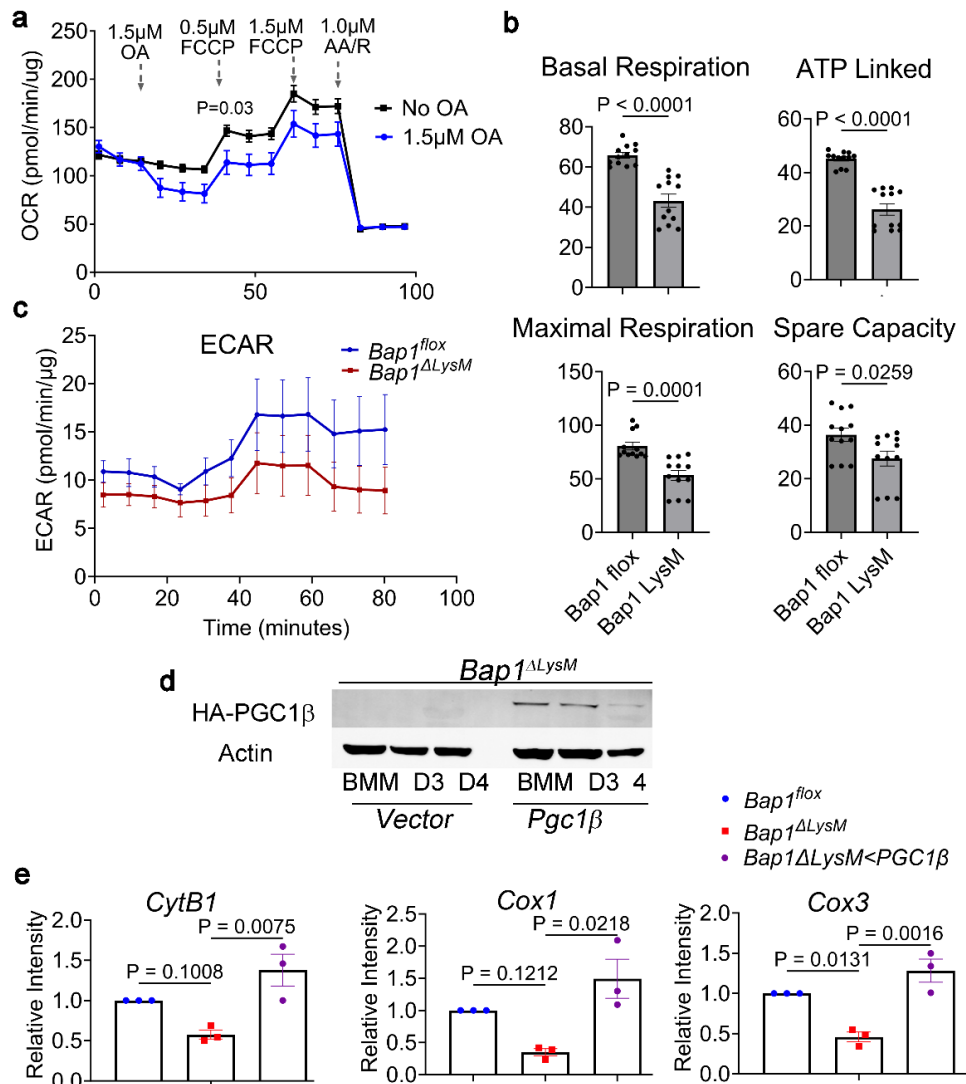

## Supplementary Fig. 6: Bap1 regulates osteoclast mitochondrial respiration. a Oxygen

consumption profiles for WT osteoclast precursors.  $6.0 \times 10^4$  cells/well were plated in XF96

plates and grown for 3 days in presence of 100ng/ml RANKL. On the day of the assay, culture

media was changed to unbuffered DMEM (pH7.4) supplemented with 10 mM glucose, 200

ng/ml GST-RANKL and 100 ng/ml M-CSF, 1mM pyruvate and 2 mM glutamine. Arrows

indicate sequential additions of oligomycin (1.5μM, except for black line group), two sequential

pulses of FCCP [FCCP]= 0.5μM followed by 1.5 μM (2.0μM final), and rotenone with

antimycin A (1.0 μM) (n=2 independent experiments). b Quantification of OCR parameters of



78 *Bap1<sup>fllox</sup>* and *Bap1<sup>ΔLysM</sup>* preOCs. **c** Extracellular acidification rate (ECAR) measured during mito  
79 stress test assay (n=4 independent experiments). **d** and **e** *Bap1<sup>ΔLysM</sup>* BMMs transduced with  
80 *Pgc1β* or *vector*, were exposed to M-CSF and RANKL. **d** Abundance of HA-PGC1β determined  
81 by immunoblot and (**e**) qPCR determined mitochondrial biogenesis markers mRNA (n=2  
82 independent experiments). Data represents mean  $\pm$  SEM. *P* values shown are determined by two-  
83 way ANOVA with Sidak's multiple comparison test (**a**, **c**, **e**) or two sided Student *t* test (**b**).  
84 Source data are provided as Source Data file.

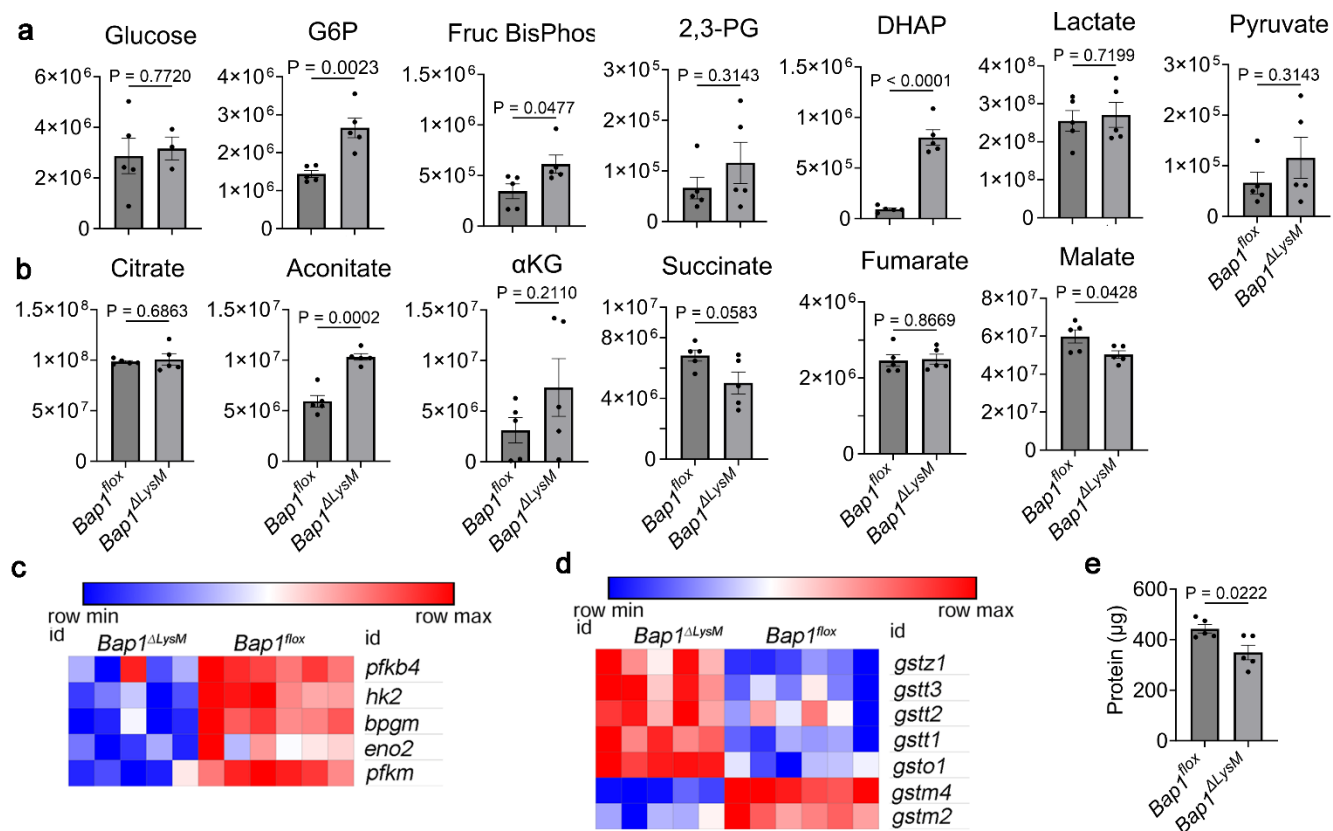

**Supplementary Fig. 7: Bap1 regulates metabolic reprogramming in osteoclast.** **a** Relative abundance of glutamine, aspartate and glutamate in the cell determined by LC-MS analysis. **b** heatmap of downregulated glycolytic genes. **c** heatmap of upregulated gst genes and **d** Protein content by genotype (n=5 biologically independent samples). Data represents mean  $\pm$  SEM. P values shown are determined by two-sided Student *t* test (**a**, **d**). Source data are provided as a Source Data file.

97 **Supplementary Table 1: Oligonucleotide List**

| Primer name           | type     | 5'-3'                                |
|-----------------------|----------|--------------------------------------|
| <i>B4galI4</i> For    | qPCR     | AACCCACCTTATCACCTCTCC                |
| <i>B4galI4</i> Rev    | qPCR     | TAGCACCCACAAAGTAGTTGC                |
| <i>Bap1C91A</i> For   | SDM      | CAGCTGATACCCAACTCTGCTGCAACTCATGCCTTG |
| <i>Bap1C91A</i> Rev   | SDM      | CAAGGCATGAGTTGCAGCAGAGTTGGGTATCAGCTG |
| <i>bglobin</i> For    | qPCR-DNA | GAAGCGATTCTAGGGAGCAG                 |
| <i>bglobin</i> Rev    | qPCR-DNA | GGAGCAGCAGCGATTCTGAGTAGA             |
| <i>CathepsinK</i> For | qPCR     | AGGCAGCTAAATGCAGAGGGTACA             |
| <i>CathepsinK</i> Rev | qPCR     | AGCTTGCATCGATGGACACAGAGA             |
| <i>Cox1</i> For       | qPCR     | TTTTCAGGCTTCACCCTAGATGA              |
| <i>Cox1</i> Rev       | qPCR     | GAAGAATGTTATGTTTACTCCTACGAA          |
| <i>Cox3</i> For       | qPCR     | CGGAAGTATTTTCTTTGCAGGAT              |
| <i>Cox3</i> Rev       | qPCR     | CAGCAGCCTCCTAGATCATGTG               |
| <i>CytB1</i> For      | qPCR     | GCCACCTTGACCCGATTCT                  |
| <i>CytB1</i> Rev      | qPCR     | TTGCTAGGGCCGCGATAAT                  |
| <i>DCStamp</i> For    | qPCR     | ACTAGAGGAGAAGTCCTGGGAGTC             |
| <i>DCStamp</i> Rev    | qPCR     | CACCCACATGTAGAGATAGGTCAG             |
| <i>Ehhadh</i> For     | qPCR     | ATGGCTGAGTATCTGAGGCTG                |
| <i>Ehhadh</i> Rev     | qPCR     | GGTCCAAACTAGCTTTCTGGAG               |
| <i>Ephx1</i> For      | qPCR     | GGAGACCTTACCACTGAAGATG               |
| <i>Ephx1</i> Rev      | qPCR     | GCCCCGAACCTATCTATCCTCT               |
| <i>Fabp7</i> For      | qPCR     | GGACACAATGCACATTCAAGAAC              |
| <i>Fabp7</i> Rev      | qPCR     | CCGAACCACAGACTTACAGTTT               |
| <i>Gapdh</i> For      | qPCR     | AGGTCGGTGTGAACGGATTTG                |
| <i>Gapdh</i> Rev      | qPCR     | TGTAGACCATGTAGTTGAGGTCA              |
| <i>Gclc</i> For       | qPCR     | GGGGTGACGAGGTGGAGTA                  |
| <i>Gclc</i> Rev       | qPCR     | GTTGGGGTTTGTCTCTCCC                  |
| <i>Ggt5</i> For       | qPCR     | TTCAATGGGACAGAAACCTTGAG              |
| <i>Ggt5</i> Rev       | qPCR     | TCCCTGTGTATAAGACCTCCG                |
| <i>Gss</i> For        | qPCR     | CAAAGCAGGCCATAGACAGGG                |
| <i>Gss</i> Rev        | qPCR     | AAAAGCGTGAATGGGGCATAAC               |
| <i>Gsta3</i> For      | qPCR     | AAGAATGGAGCCTATCCGGTG                |
| <i>Gsta3</i> Rev      | qPCR     | CCATCACTTCGTAACCTTGCC                |
| <i>hBAP1</i> For      | qPCR     | GATACGTCCGTGATTGATGATGA              |
| <i>hBAP1</i> Rev      | qPCR     | TGAGTTGCACAAGAGTTGGGTA               |
| <i>integrinb3</i> For | qPCR     | TTCGACTACGGCCAGATGATT                |
| <i>integrinb3</i> Rev | qPCR     | GGAGAAAGACAGGTCCATCAAGT              |
| <i>mBap1</i> For      | qPCR     | CTCCTGGTGAAGATTTCCGT                 |
| <i>mBap1</i> Rev      | qPCR     | GAGTGGCACAAGAGTTGGGAA                |
| <i>mtCO2</i> For      | qPCR-DNA | CCGACTAAATCAAGCAACA                  |

| Primer Name                         | Type      | 5'-3'                     |
|-------------------------------------|-----------|---------------------------|
| <i>mtCO2</i> Rev                    | qPCR-DNA  | CAATGGGCATAAAGCTATGG      |
| <i>Nd4</i> For                      | qPCR      | CATCACTCTATTCTGCCTAGCAA   |
| <i>Nd4</i> Rev                      | qPCR      | TCCTCGGGCCATGATTATAGTAC   |
| <i>Nfatc1</i> For                   | qPCR      | CCCGTCACATTCTGGTCCAT      |
| <i>Nfatc1</i> Rev                   | qPCR      | CAAGTAACCGTGTAGCTGCACAA   |
| <i>Pgc1b</i> For                    | qPCR      | CTCCAGGCAGGTTCAACCC       |
| <i>Pgc1b</i> Rev                    | qPCR      | GGGCCAGAAGTTCCTTAGG       |
| <i>Siglec1</i> For                  | qPCR      | CAGGGCATCCTCGACTGTC       |
| <i>Siglec1</i> Rev                  | qPCR      | GGAGCATCGTGAAGTTGGTTG     |
| <i>Slc6a12</i> For                  | qPCR      | GGTCCCTGAGGAAGGAGAGAT     |
| <i>Slc6a12</i> Rev                  | qPCR      | GGGGATGAAGAAAGCTCCACC     |
| <i>Slc6a4</i> For                   | qPCR      | TATCCAATGGGTACTCCGCAG     |
| <i>Slc6a4</i> Rev                   | qPCR      | CCGTTCCCCTTGGTGAATCT      |
| <i>Slc6a5</i> for                   | qPCR      | CCACCGGGATAGTCCTCGT       |
| <i>Slc6a5</i> Rev                   | qPCR      | GGCTGCTGAGATTACAAAACCC    |
| <i>Slc7a11</i> For                  | qPCR      | GGCACCGTCATCGGATCAG       |
| <i>Slc7a11</i> Rev                  | qPCR      | CTCCACAGGCAGACCAGAAAA     |
| <i>Slc7a11</i> promoter 2 For       | ChIP qPCR | CCAAGACTTTCACCTGGAAAGGATA |
| <i>Slc7a11</i> promoter 2 Rev       | ChIP qPCR | GAGACTGCACAGGGAATACAC     |
| <i>Slc7a11</i> promoter distant For | ChIP qPCR | TGAAGACACGCACAGAGCAA      |
| <i>Slc7a11</i> promoter distant Rev | ChIP qPCR | ATTTCCGGCTTTGAGCTAAC      |
| <i>Slc7a11</i> promoter near For    | ChIP qPCR | CGTGGAAGGCTCCGTATTTA      |
| <i>Slc7a11</i> promoter near Rev    | ChIP qPCR | TAATGTTGGCGCTTTCTCAA      |

99 **Supplementary Table 2: Antibody List**

| <b>Antibody</b>                           | <b>Company</b>              | <b>Catalog No.</b> | <b>Lot No.</b> | <b>Dilution</b> | <b>Application</b> | <b>Validation</b> |
|-------------------------------------------|-----------------------------|--------------------|----------------|-----------------|--------------------|-------------------|
| Alexa 488 Phalloidin                      | Thermo Scientific           | A12379             | 1360987        | 1:60            | IFC                | Mouse             |
| Actin                                     | Sigma Aldrich               | A2228              | 476697         | 1:10,000        | WB                 | Mouse             |
| Bap1                                      | Cell Signaling Technologies | 13187s             | 1              | 1:1000<br>5ug   | WB<br>ChIP         | Human             |
| CathepsinK                                | EMD Millipore               | MAB3324 (182-12G5) | 2519359        | 1:1000          | WB                 | Human             |
| H2AK119ub1                                | Cell Signaling Technologies | 8240s(D27C4xp)     | 8              | 1:2000<br>5ug   | WB<br>ChIP         | Mouse             |
| Normal Mouse IgG                          | SantaCruz Biotechnologies   | Sc2025             | LH0615         | 5ug             | ChIP               | Mouse             |
| Normal Rabbit IgG                         | SantaCruz Biotechnologies   | Sc2027             | B0515          | 5ug             | ChIP               | Mouse             |
| Integrinb3                                | Cell Signaling Technologies | 4702s              | 5              | 1:1000          | WB                 | Mouse             |
| NFATc1                                    | SantaCruz Biotechnologies   | Sc7294(7A6)        | 12214          | 1:100           | WB                 | Mouse             |
| pSrc                                      | Cell Signaling Technologies | 2010L              | 17             | 1:1000          | WB                 | Mouse             |
| Rac1                                      | Thermo Scientific           | 1862341            | we328014       | 1:1000          | IP/WB              | Mouse             |
| ubiquitin                                 | Cell Signaling Technologies | 3936s (P4D1)       | 18             | 5ug             | IP                 | Mouse             |
| VDAC                                      | Cell Signaling Technologies | 4661s (D73D12)     | 10             | 1:1000          | WB                 | Mouse             |
| HA tag                                    | Covance                     | 16B12              |                | 1:1000          | WB                 | Mouse             |
| Goat anti-Rabbit IgG Alexa Fluor™ 680     | Thermo Scientific           | 21109              | 37505A         | 1:5000          | WB                 | Rabbit            |
| Goat anti-Mouse IgG Alexa Fluor™ 680      | Thermo Scientific           | 21058              | 35818A         | 1:5000          | WB                 | Mouse             |
| Rabbit IgG DyLight™ 800 Donkey Polyclonal | Rockland                    | 611-732-127        | 25342          | 1:5000          | WB                 | Rabbit            |
| Mouse IgG DyLight™ 800 Donkey Polyclonal  | Rockland                    | 611-432-042        | 18247          | 1:5000          | WB                 | Mouse             |

100

101 **Uncropped Immunoblots used in supplementary figures:**

Extended Data **3b** pSrc (Y416) and Actin blot

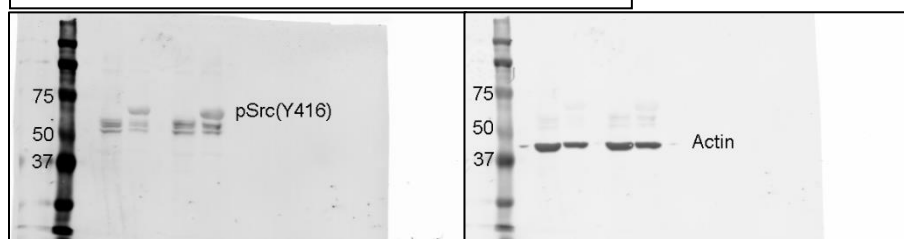

Extended Data **3c** VDAC and Actin blot

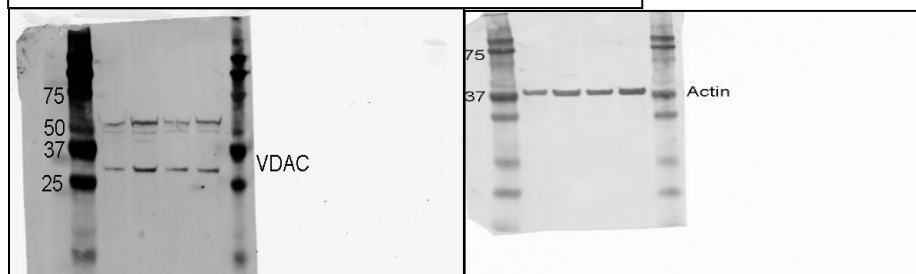

Extended Data **5c**: SLC7A11 and Actin

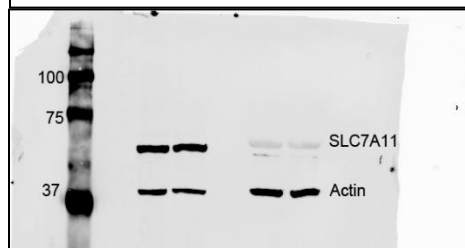

Extended Data **6d**: HA-PGC1b and Actin

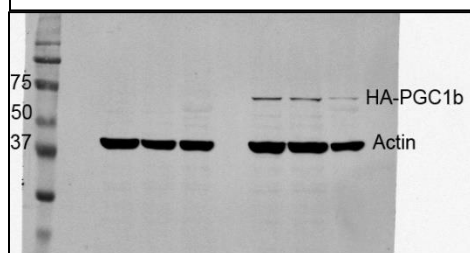

Supplement: MOESM1 [file 41467_2023_41629_MOESM1_ESM.pdf]
